# Supplementary figures and images for: Suppression of ovulation and pharmacokinetics following subcutaneous administration of various doses of Depo-Provera®: a randomized trial
Source: PubMed Central journal article supplement — Contracept X. 2021 Oct 2;3:100070. doi: 10.1016/j.conx.2021.100070 (PMC8551587; doi:10.1016/j.conx.2021.100070), 2021-10-02

Supplemental Figure S1

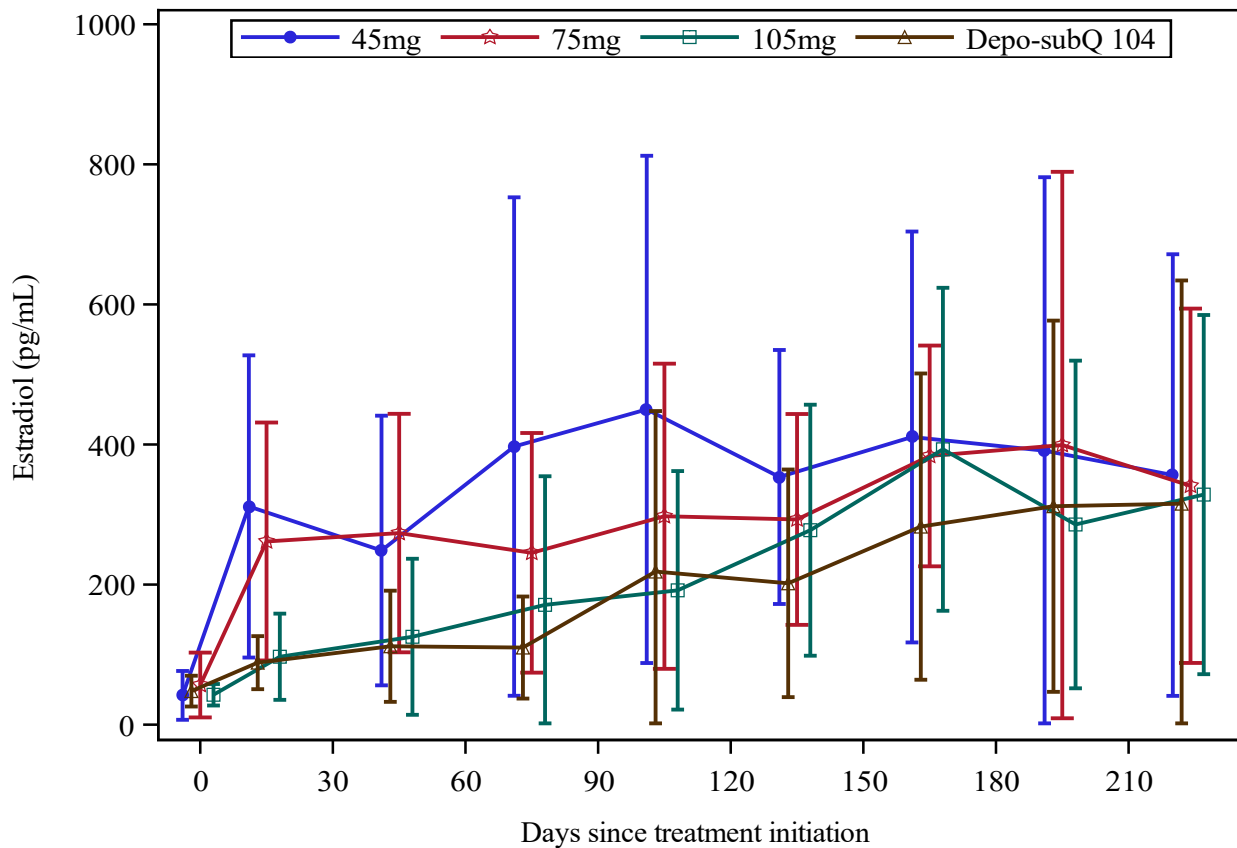

Supplement: mmc1.pdf [file mmc1.pdf]

Supplemental Figure S2

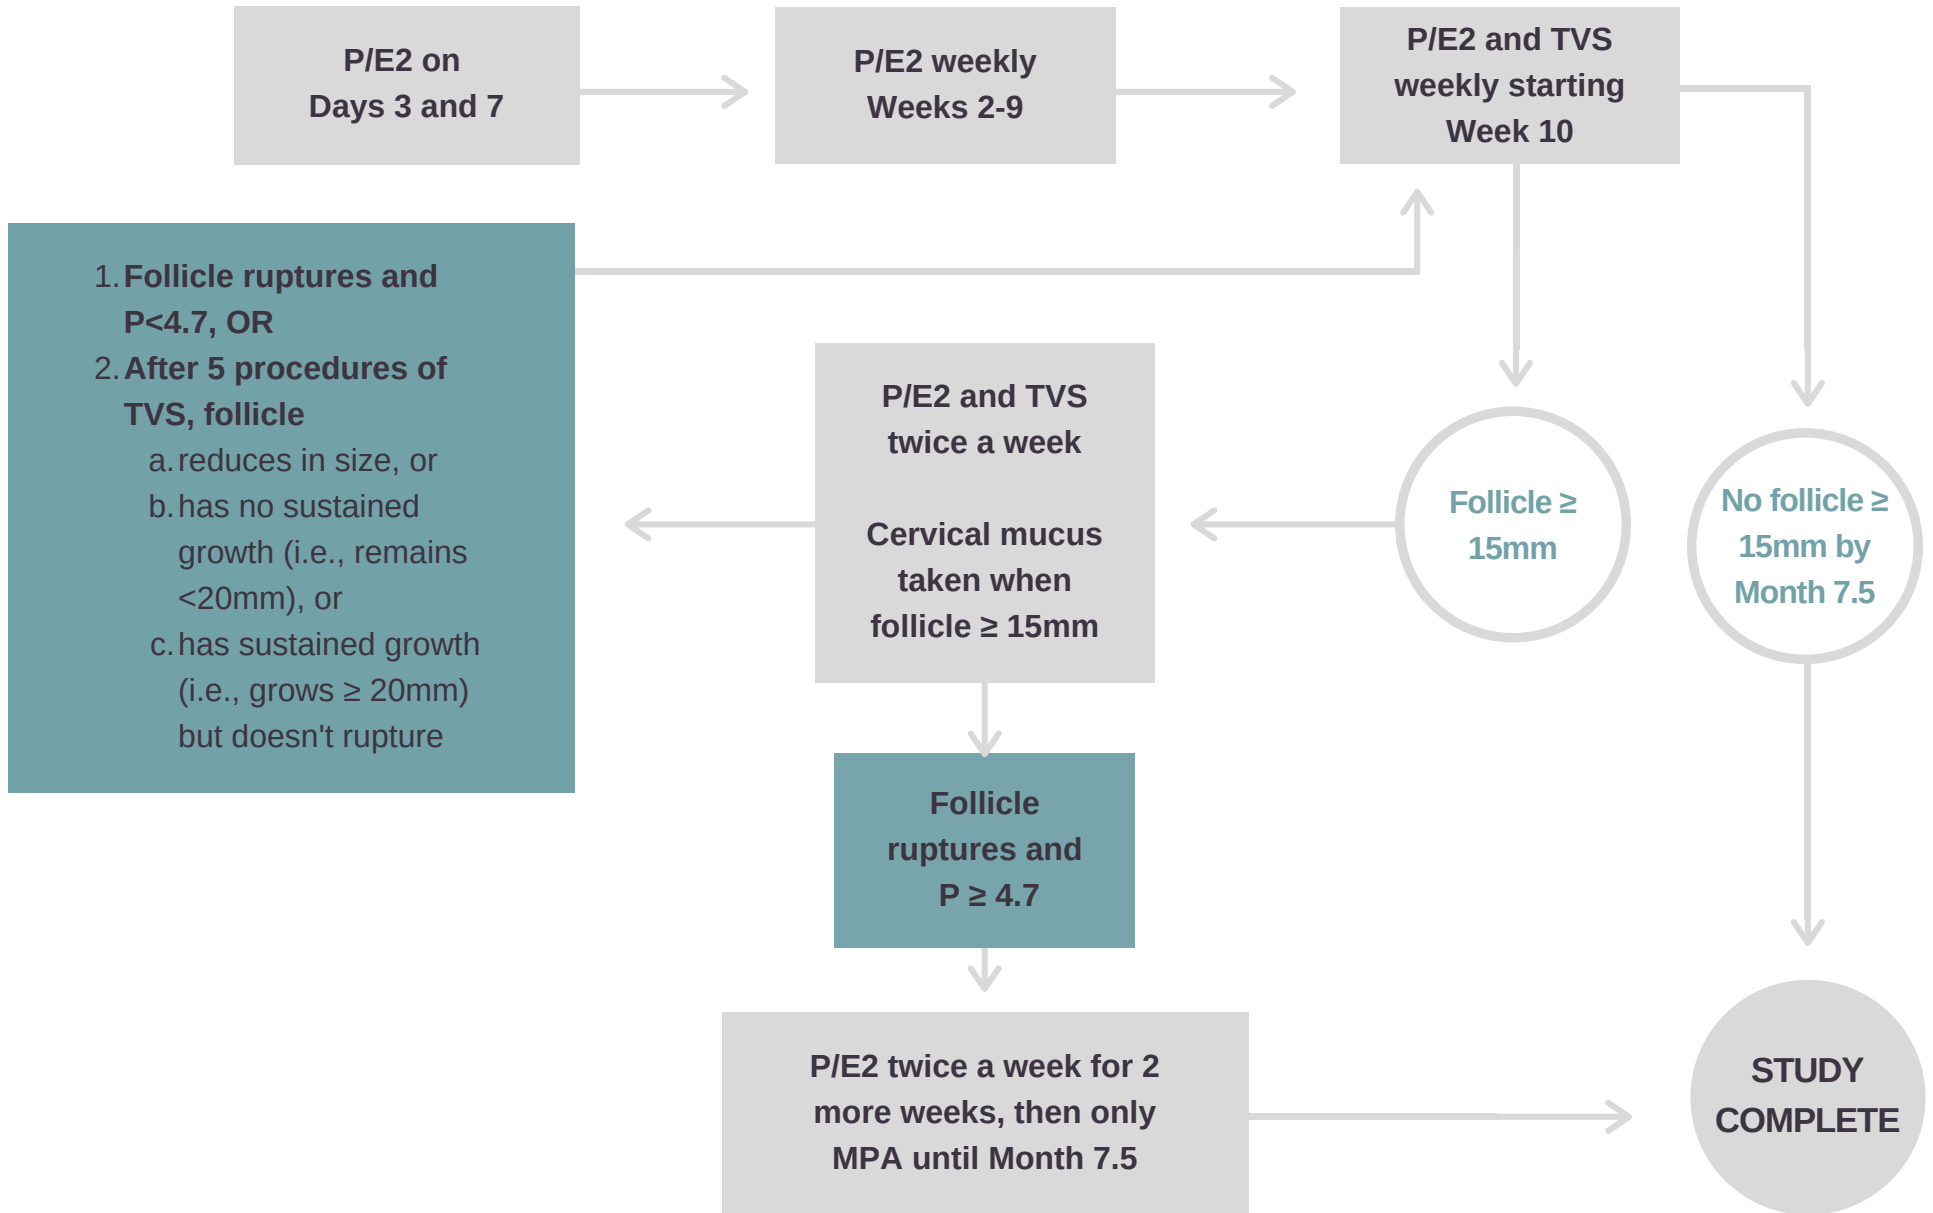

Supplement: mmc2.pdf [file mmc2.pdf]
